# Supplementary material for: Reconciling Sexism and Women’s Support for Republican Candidates: A Look at Gender, Class, and Whiteness in the 2012 and 2016 Presidential Races
Source: Springer Nature journal article supplement (doi:10.1007/s11109-018-9468-2), 2018-05-18
Supplement: MOESM1 [file 15775872]

Online Appendix

“Reconciling Sexism and Women’s Support for Republican Candidates: A Look at Gender, Class, and Whiteness in the 2012 and 2016 Presidential Races”

Table A1. Variable Descriptions

|  |  |
| --- | --- |
| Female | A dummy variable coded 1 if the respondent is female and 0 if the respondent is male. |
| Black  Hispanic  Other Race | A series of dummy variables indicating respondent race. White is the excluded category. |
| Education | Educational attainment measured in five categories: Less than a high school degree, high school degree, some college, bachelor’s degree, and graduate degree. |
| College | A dummy variable coded 1 if a respondent has a 4-year degree and zero otherwise. |
| Income | Household income measured in 18 increments, ranging from “under $5,000, to “greater than $250,000” |
| Upper Class  Middle Class | A series of dummy variables, where upper class indicates a household income > $125,000 and middle class indicates a household income ranging from $42,000 to $125,000. Lower class (those with a household income <$42,0000) is the excluded category. |
| Employed  Homemaker | A series of dummy variables indicating employment status, with unemployed and retired serving as the baseline categories. |
| Age | Respondent age in years. |
| Married | A dummy variable coded 1 if respondents are married and zero otherwise. |
| Kids < 18 | A dummy variable coded 1 if there is one or more child under the age of 18 in the home and 0 otherwise. |
| South | A dummy variable coded 1 if the respondent resides in the South and zero otherwise. |
| Church Attendance | A 6-points Likert scale ranging from never attends church to attends church more than one a week. |
| Biblical Literalist | A dummy variable coded 1 if the respondent takes a literal interpretation of the Bible. |
| Party Identification | A series of dummy variables indicating party identification, with Democrats serving as a baseline category. |
| Ideology | A 7-point scale ranging from extremely liberal to extremely conservative. |
| Egalitarianism | A mean-centered, multi-item scale gauging endorsement of egalitarian values. (α12=.69, α16=.68) |
| Scope of Gov. | A mean-centered, multi-item scale gauging beliefs about the proper scope of government. High scores correspond to a preference for smaller government. (α12=.81, α16=.76) |
| Racial Resentment | A mean-centered, multi-item scale gauging system justification beliefs about race. High scores correspond to more racist attitudes. (α12=.80, α16=.85) |
| Authoritarianism | An additive, multi-item scale gauging authoritarian attitudes. High scores correspond to higher levels of endorsement for authoritarianism. (α12=.61, α16=.64) |

α12 is the scale reliability coefficient for the 2012 ANES data, and α16 is the scale reliability coefficient for the 2016 ANES data. Complete replication information is available at the *Political Behavior* Dataverse.

Table A2. Voter Characteristics in 2016

|  | All Survey Respondents | | | | White Survey Respondents Only | | | |
| --- | --- | --- | --- | --- | --- | --- | --- | --- |
|  | Clinton Voters | | Trump Voters | | Clinton Voters | | Trump Voters | |
|  | Men | Women | Men | Women | Men | Women | Men | Women |
| White | 60.15 | 56.98 | 87.42 | 90.36 |  |  |  |  |
| Black | 16.95 | 22.01 | 1.60 | 1.41 |  |  |  |  |
| Hispanic | 15.96 | 13.29 | 5.70 | 4.48 |  |  |  |  |
| Other Race | 6.94 | 7.73 | 5.28 | 3.75 |  |  |  |  |
| College | 39.75 | 45.21 | 34.38 | 28.82 | 47.64 | 57.23 | 34.21 | 29.06 |
| Lower Income | 30.25 | 31.82 | 18.70 | 32.05 | 24.63 | 22.19 | 17.67 | 32.10 |
| Middle Income | 45.47 | 46.96 | 55.37 | 50.72 | 47.00 | 50.78 | 56.95 | 50.23 |
| Upper Income | 24.28 | 21.22 | 25.93 | 17.22 | 28.36 | 27.02 | 25.38 | 17.66 |
| Employed | 62.31 | 63.21 | 72.8 | 48.96 | 64.21 | 64.13 | 72.82 | 48.30 |
| Homemaker | 0.23 | 5.43 | 0.13 | 17.92 | 0.39 | 5.69 | 0.15 | 17.39 |
| Under 35 | 28.39 | 25.97 | 19.53 | 17.22 | 25.93 | 22.25 | 18.09 | 17.05 |
| 35 - 59 | 43.24 | 45.84 | 48.38 | 43.46 | 40.31 | 45.33 | 48.76 | 41.95 |
| Over 60 | 28.36 | 28.20 | 32.08 | 39.32 | 33.76 | 32.41 | 33.15 | 41.00 |
| Married | 58.84 | 52.63 | 73.17 | 72.84 | 62.50 | 63.90 | 75.48 | 74.34 |
| Children | 32.52 | 36.37 | 31.62 | 30.21 | 29.49 | 30.02 | 29.91 | 29.82 |
| Church Attend. | 20.79 | 26.95 | 39.41 | 48.88 | 17.99 | 22.00 | 37.16 | 48.33 |
| Biblical Literalist | 17.82 | 21.82 | 37.54 | 43.81 | 10.46 | 8.47 | 34.84 | 44.04 |
| South | 27.28 | 32.43 | 38.83 | 44.13 | 20.21 | 22.77 | 38.18 | 42.84 |
| Democrat | 84.94 | 88.91 | 6.76 | 10.28 | 85.01 | 85.91 | 0.72 | 10.28 |
| Independent | 7.32 | 4.83 | 7.58 | 9.51 | 6.61 | 5.44 | 6.50 | 9.49 |
| Republican | 7.74 | 6.26 | 85.66 | 80.22 | 8.37 | 8.65 | 86.3 | 80.23 |
| *Observations* | 559 | 783 | 625 | 612 | 358 | 476 | 549 | 558 |

Data from the 2016 American National Election Study. Entries are percentages. Survey weights are applied. See Table A1 for measurement information.

Table A3. Voter Characteristics in 2012

|  | All Survey Respondents | | | | White Survey Respondents Only | | | |
| --- | --- | --- | --- | --- | --- | --- | --- | --- |
|  | Obama Voters | | Romney Voters | | Obama Voters | | Romney Voters | |
|  | Men | Women | Men | Women | Men | Women | Men | Women |
| White | 57.85 | 58.01 | 88.48 | 89.71 |  |  |  |  |
| Black | 23.1 | 23.76 | 1.37 | 0.35 |  |  |  |  |
| Hispanic | 13.27 | 12.61 | 5.59 | 5.61 |  |  |  |  |
| Other Race | 5.78 | 5.62 | 4.56 | 4.33 |  |  |  |  |
| College Degree | 35.20 | 31.63 | 36.55 | 31.41 | 42.86 | 38.64 | 37.72 | 30.92 |
| Lower Income | 36.23 | 44.49 | 27.59 | 29.13 | 28.23 | 35.08 | 27.29 | 29.08 |
| Middle Income | 48.50 | 40.63 | 53.85 | 55.77 | 53.04 | 45.69 | 53.93 | 56.05 |
| Upper Income | 15.27 | 14.88 | 18.56 | 15.10 | 18.73 | 19.23 | 18.77 | 14.87 |
| Employed | 56.78 | 44.70 | 62.00 | 44.29 | 57.79 | 46.15 | 61.14 | 43.73 |
| Homemaker | 0.52 | 9.96 | 0.48 | 17.93 | 0.64 | 9.84 | 0.55 | 18.95 |
| Under 35 | 25.84 | 27.71 | 20.02 | 17.57 | 19.81 | 21.00 | 19.56 | 16.37 |
| 35 - 59 | 46.48 | 43.76 | 45.80 | 45.80 | 47.94 | 45.07 | 44.91 | 45.52 |
| Over 60 | 27.69 | 28.52 | 34.17 | 36.63 | 32.26 | 33.93 | 35.53 | 38.11 |
| Married | 55.81 | 50.71 | 70.66 | 78.06 | 62.78 | 57.11 | 71.36 | 80.39 |
| Children | 30.91 | 34.83 | 32.54 | 32.57 | 25.44 | 28.27 | 32.06 | 32.82 |
| Frequent Church | 23.06 | 29.95 | 38.55 | 51.61 | 15.02 | 23.00 | 37.57 | 51.83 |
| Biblical Literalist | 21.23 | 27.31 | 32.80 | 38.08 | 10.08 | 13.05 | 32.74 | 37.43 |
| South | 35.35 | 34.66 | 36.78 | 38.32 | 29.25 | 23.02 | 36.53 | 37.46 |
| Democrat | 85.62 | 86.89 | 6.31 | 9.33 | 84.49 | 83.28 | 6.06 | 8.76 |
| Independent | 8.31 | 7.55 | 7.03 | 8.81 | 7.80 | 9.55 | 6.84 | 8.90 |
| Republican | 6.07 | 5.56 | 86.66 | 81.86 | 7.71 | 7.17 | 87.11 | 82.43 |
| Observations | 1141 | 1355 | 874 | 818 | 517 | 597 | 726 | 693 |

Data are from the 2012 ANES. Entries are weighted percentages.

Table A4: Sexism and White Women’s Feelings toward the Presidential Candidates

|  | (1) | (3) |
| --- | --- | --- |
|  | Feelings toward Romney in 2012 | Feelings toward Trump in 2016 |
| Hostile Sexism | -1.53 | 2.10+ |
|  | (1.07) | (1.20) |
| Discrimination Against Women | -2.14* | -3.28*** |
|  | (1.00) | (0.95) |
| College | -2.43 | -2.21 |
|  | (1.53) | (1.92) |
| Upper Class | 1.36 | 1.11 |
|  | (1.75) | (2.24) |
| Lower Class | -1.58 | 6.58** |
|  | (1.64) | (2.02) |
| Employed | 1.54 | -2.15 |
|  | (1.73) | (2.10) |
| Homemaker | -0.68 | 2.73 |
|  | (2.34) | (3.69) |
| Age | 0.12* | 0.06 |
|  | (0.06) | (0.05) |
| Married | 1.33 | 1.87 |
|  | (1.70) | (1.73) |
| Kids<18 | 2.02 | -0.01 |
|  | (1.77) | (1.92) |
| Church Attendance | 1.75*** | -0.55 |
|  | (0.43) | (0.51) |
| Biblical Literalist | -0.13 | 7.17** |
|  | (1.77) | (2.16) |
| South | 4.08** | 2.51 |
|  | (1.39) | (1.61) |
| Republican | 8.80** | 8.30** |
|  | (2.83) | (3.09) |
| Independent | 26.24*** | 23.66*** |
|  | (2.67) | (2.92) |
| Ideology | 4.89*** | 3.94*** |
|  | (0.95) | (0.88) |
| Scope of Government | 3.02** | 0.09 |
|  | (1.06) | (1.12) |
| Egalitarianism | 0.91 | -1.09 |
|  | (0.90) | (1.04) |
| Racial Resentment | 2.35* | 7.87*** |
|  | (1.00) | (1.09) |
| Authoritarianism | 0.44 | 1.54* |
|  | (0.69) | (0.78) |
| Constant | 11.34* | 16.61** |
|  | (5.68) | (5.85) |
| Observations | 1,405 | 1,208 |
| *R*2 | 0.55 | 0.59 |

Models 1 and 2 are OLS regression models. Standard errors are in parentheses. + p<.10, * p<.05, ** p<.01, *** p<.001. Shaded cells indicate the coefficients for the 2012 and 2016 survey are significantly different from one another in post-hoc Wald tests following seemingly unrelated logit models at the p<.10 level or lower.

**Discussion of Table A4:**

Table A4 uses a 101-point feeling thermometers for both Republican presidential candidates to determine whether candidate evaluations were more polarized for some groups of men and women. We show that the results for vote choice reported in Table 3 are consistent with feelings towards Romney and Trump. As with vote choice, white women who display hostile sexist attitudes report warmer feelings towards Trump. The same is not true for Romney. As a matter of fact, hostile sexism is not correlated with feelings towards Romney. The difference in coefficient size across the 2012 and 2016 models is significant at the p<.05 level. In this analysis, we do observe that the denial of discrimination against women is correlated with support for both Romney and Trump. Specifically, women who perceive discrimination is not a problem American women face are more likely to display warm feelings towards both candidates. That said, the magnitude of this relationship in 2016 is more than fifty percent stronger than the relationship observed in 2012.[[1]](#footnote-1) This result is consistent with Hypothesis 5, which argues that sexism played a larger role in voter decision making in 2016 relative to 2012.

As with vote choice, whereas class is not associated with feelings towards Romney in 2012, lower income women were far *more* likely than their middle-income counterparts to report warm feelings towards Trump in 2016. Thus, here too we observe that class exerts an independent impact on white women’s feelings towards Trump. In sum, the analyses reported in Table 3 indicate that whereas sexism is not strongly associated with warm feelings towards Romney in 2012, sexism is a robust indicator of support for Trump—even when accounting for ideology, party identification, and other political beliefs. Taken together, these results provide additional support for Hypotheses 2, 3 and 5.

Table A5: Gender Differences in the Effects of Sexism on Vote Choice and Feelings Towards Presidential Candidates

|  | Vote Romney 2012 | Vote Trump 2016 | Feel Romney 2012 | Feel Trump 2016 |
| --- | --- | --- | --- | --- |
| Female | -0.01 | 1.22+ | 5.27 | 1.61 |
|  | (0.83) | (0.66) | (3.36) | (3.83) |
| Hostile Sexism | 0.24 | 0.41+ | -1.31 | 2.89* |
|  | (0.17) | (0.24) | (0.93) | (1.34) |
| Female * Hostile Sexism | -0.41 | 0.01 | 0.08 | -1.09 |
|  | (0.29) | (0.31) | (1.33) | (1.54) |
| Discriminate Women | -0.28 | -0.08 | -1.60+ | -2.27* |
|  | (0.19) | (0.16) | (0.87) | (1.11) |
| Female * Discriminate | 0.05 | -0.41+ | -0.56 | -0.99 |
|  | (0.28) | (0.24) | (1.27) | (1.36) |
| College | -0.37 | -0.41 | -0.81 | -3.51** |
|  | (0.30) | (0.28) | (1.06) | (1.29) |
| Upper Class | -0.24 | -0.01 | -0.90 | -0.57 |
|  | (0.40) | (0.34) | (1.25) | (1.44) |
| Lower Class | -0.05 | 0.36 | -2.03+ | 3.82* |
|  | (0.23) | (0.25) | (1.16) | (1.58) |
| Employed | 0.05 | 0.32 | 0.46 | -2.12 |
|  | (0.26) | (0.35) | (1.15) | (1.53) |
| Homemaker | -0.18 | 1.56** | -0.99 | 2.55 |
|  | (0.40) | (0.58) | (1.98) | (3.44) |
| Age | 0.00 | 0.00 | 0.09* | 0.00 |
|  | (0.01) | (0.01) | (0.04) | (0.04) |
| Married | 0.21 | 0.08 | 0.88 | 1.25 |
|  | (0.24) | (0.30) | (1.13) | (1.42) |
| Kids<18 | 0.30 | 0.06 | 1.13 | -0.07 |
|  | (0.27) | (0.32) | (1.22) | (1.43) |
| Church Attendance | 0.19** | 0.08 | 1.36*** | -0.77+ |
|  | (0.07) | (0.08) | (0.30) | (0.39) |
| Biblical Literalist | 0.24 | 0.22 | 0.52 | 7.25*** |
|  | (0.31) | (0.29) | (1.26) | (1.53) |
| South | 0.33 | 0.81** | 1.80+ | 2.57+ |
|  | (0.21) | (0.30) | (0.98) | (1.33) |
| Republican | 1.38*** | 1.87*** | 9.63*** | 8.37** |
|  | (0.28) | (0.31) | (1.99) | (2.67) |
| Independent | 3.26*** | 2.99*** | 25.27*** | 22.79*** |
|  | (0.29) | (0.33) | (1.73) | (1.97) |
| Ideology | 0.66*** | 0.50*** | 4.75*** | 4.59*** |
|  | (0.09) | (0.11) | (0.61) | (0.66) |
| Scope of Gov. | 0.81*** | 0.50*** | 2.88*** | -0.15 |
|  | (0.16) | (0.13) | (0.74) | (0.82) |
| Egalitarianism | -0.18 | -0.18 | -0.42 | -1.33+ |
|  | (0.14) | (0.14) | (0.62) | (0.73) |
| Racial Resentment | 0.74*** | 1.08*** | 1.52* | 7.37*** |
|  | (0.15) | (0.16) | (0.70) | (0.84) |
| Authoritarianism | -0.04 | 0.29* | 0.58 | 1.89** |
|  | (0.10) | (0.11) | (0.44) | (0.59) |
| Constant | -4.14*** | -4.98*** | 10.84** | 17.10** |
|  | (0.86) | (1.02) | (3.72) | (5.65) |
| Observations | 1,147 | 912 | 1,405 | 1,208 |
| *Pseudo R*2 *(R*2*)* | 0.69 | 0.71 | 0.54 | 0.59 |

Models 1 and 2 are logit models and Models 3 and 4 are OLS regression models. Standard errors are in parentheses. + p<.10, * p<.05, ** p<.01, *** p<.001

Table A6: White Women’s Vote Choice and Feelings Towards Presidential Candidates, Controlling for Rurality

|  | (1) | (2) | (3) | (4) |
| --- | --- | --- | --- | --- |
|  | Vote Romney 2012 | Vote Trump 2016 | Feel Romney 2012 | Feel Trump 2016 |
| Hostile Sexism | -0.17 | 0.47* | -1.67 | 2.03+ |
|  | (0.25) | (0.22) | (1.08) | (1.22) |
| Discriminate Women | -0.21 | -0.46** | -2.16* | -3.28*** |
|  | (0.20) | (0.17) | (1.00) | (0.94) |
| College | -0.45 | -0.51 | -2.49 | -2.50 |
|  | (0.46) | (0.37) | (1.52) | (1.90) |
| Upper Class | -0.29 | 0.35 | 1.12 | 1.09 |
|  | (0.47) | (0.40) | (1.73) | (2.22) |
| Lower Class | -0.48 | 0.79** | -1.79 | 6.63** |
|  | (0.33) | (0.30) | (1.61) | (2.06) |
| Employed | 0.26 | -0.26 | 1.51 | -2.00 |
|  | (0.37) | (0.41) | (1.72) | (2.09) |
| Homemaker | -0.12 | 1.36* | -0.76 | 3.35 |
|  | (0.48) | (0.63) | (2.32) | (3.72) |
| Age | 0.01 | -0.02 | 0.11* | 0.07 |
|  | (0.01) | (0.01) | (0.06) | (0.06) |
| Married | 0.25 | 0.40 | 1.38 | 1.87 |
|  | (0.32) | (0.36) | (1.67) | (1.74) |
| Kids<18 | 0.41 | -0.55 | 1.61 | -0.18 |
|  | (0.41) | (0.49) | (1.74) | (1.96) |
| Church Attendance | 0.17+ | 0.07 | 1.69*** | -0.55 |
|  | (0.10) | (0.09) | (0.43) | (0.52) |
| Biblical Literalist | 0.18 | 0.56 | 0.04 | 7.15** |
|  | (0.39) | (0.43) | (1.77) | (2.17) |
| South | 0.63* | 0.70* | 4.30** | 2.95+ |
|  | (0.26) | (0.34) | (1.38) | (1.62) |
| Republican | 1.17** | 1.97*** | 9.10** | 8.35** |
|  | (0.37) | (0.40) | (2.80) | (3.07) |
| Independent | 3.18*** | 2.87*** | 25.73*** | 23.74*** |
|  | (0.40) | (0.40) | (2.70) | (2.86) |
| Ideology | 0.70*** | 0.49** | 4.83*** | 3.92*** |
|  | (0.12) | (0.15) | (0.95) | (0.87) |
| Scope of Gov. | 0.84*** | 0.53** | 3.14** | 0.04 |
|  | (0.20) | (0.18) | (1.06) | (1.13) |
| Egalitarianism | -0.13 | -0.12 | 0.79 | -1.15 |
|  | (0.20) | (0.21) | (0.89) | (1.04) |
| Racial Resentment | 0.73*** | 1.20*** | 2.52* | 7.97*** |
|  | (0.22) | (0.20) | (1.00) | (1.10) |
| Authoritarianism | -0.08 | 0.13 | 0.53 | 1.59* |
|  | (0.14) | (0.14) | (0.69) | (0.79) |
| Urban | 1.19+ | 4.00*** | 6.23* | 15.93* |
|  | (0.67) | (0.86) | (2.43) | (7.04) |
| Suburban | 0.30 | 0.76 | 4.76* | 9.21 |
|  | (0.62) | (0.78) | (2.05) | (6.80) |
| Rural Town | 1.15 | 1.70* | 1.71 | 10.61* |
|  | (1.01) | (0.74) | (3.37) | (5.21) |
| Urban/Rural Missing | -- | 1.22* | -- | 8.22 |
|  |  | (0.54) |  | (6.04) |
| Constant | -4.59*** | -3.34** | 11.32* | 7.22 |
|  | (0.99) | (1.25) | (5.64) | (8.45) |
| Observations | 1,147 | 912 | 1,405 | 1,208 |
| *R*2 | 0.68 | 0.70 | 0.56 | 0.59 |

Models 1 and 2 are logit models and Models 3 and 4 are OLS regression models. Standard errors are in parentheses. + p<.10, * p<.05, ** p<.01, *** p<.001

**Discussion of Table A6:**

Table A6 demonstrates that our results are robust when controlling for the urban/rural residency of respondents. Specifically, to a understand how urbanity influences the vote choice of white women we use a question from the ANES that codes whether respondents live in rural farm or undeveloped land, a rural town, a suburb, or an urban center. We created three dummy variables (Urban, Suburban, and Rural Town) and use respondents who live on a rural farm or undeveloped land as the reference category.

In 2012 this information was included for all respondents but in 2016 it was only recorded for the face-to-face (FTF) sample of the 2016 ANES survey. As a result, we only know about the rural/urban location of 265 white women who took the survey (rural farm or undeveloped land=23, a rural town=66, a suburb=139, or an urban center=37). As we are not able to draw reliable conclusions based on the small number of observations, we follow the procedure used by Barnes and Cordova (2017), by including a dummy variable that codes whether the information about rural/urban is available for the respondent. This is coded 1 if the data is missing and 0 if the data is included. This approach allows us to analyze our full sample while controlling for the rurality for respondents when this information is available.

**Figure A1: The Effect of Sexism on Candidate Evaluations**

**Figures based on the results presented in Table A5 Models 3 and 4 and include white survey respondents only.**

**Discussion of Figure A1:**

Figure 1 Panel A shows the difference in the expected value (EV) of feelings towards the Republican presidential candidate for participants who scored the minimum value on the hostile sexism scale (-1.5) compared to the EV of feelings towards the Republican presidential candidate for participants who scored the maximum value (2.8) on the hostile sexism scale. The differences in the EV of feelings towards Republicans are surrounded by 90% confidence intervals. When the confidence intervals cross zero, it indicates that the difference between the two EVs (i.e., the EV for those exhibiting high levels of hostile sexism compared to the EV those exhibiting low levels of hostile sexism) is not statistically different from zero.

First, hostile sexism is not significantly related to men’s or women’s evaluations of Romney in 2012. The confidence intervals for both groups cross zero indicating that the effect is not statistically significant. By contrast, moving from the minimum value of hostile sexism to the maximum value of hostile sexism improved respondent’s evaluations of Trump in 2016 by about 7 points for women and 12 points for men. Though the relationship for women is less robust (it is significantly different at the 88% confidence level but not at the 90% level). The results are suggestive of our expectations on Hypothesis 4, that sexism operates in a similar fashion for both men and women, but do not provide clear empirical support for it. The significant relationship between hostile sexism and feelings towards the Republican candidates in 2016, in contrast to the insignificant relationship in 2012, suggests that aspects of the 2016 campaign activated hostile sexism attitudes, consistent with Hypothesis 5.

Panel B graphs the difference between respondents who perceive low levels of discrimination against women (1 on a 5-point scale) compared to those who perceive high levels of discrimination against women (5 on a 5-point scale), using the same approach described above. Consistent with the results presented in Table A5 beliefs about gender are significantly related evaluations of the Republican presidential candidate in 2012 for both men and women. That is, women and men who perceive a great deal discrimination against women evaluate Romney less favorably (about 8.6 points for women and 6.4 points for men) than individuals who perceive no discrimination against women. Turning to 2016, we observe a similar relationship. Both women and men who perceive high levels of discrimination against women evaluate Trump less favorably (about 13 points for women and 9.1 points for men) than those who perceive no discrimination against women. Thus, consistent with the expectations stated in Hypothesis 4, we find that the relationship between perceptions of discrimination against women and feelings towards Trump operates in the same fashion for men and women. Moreover, the stronger relationship observed in 2016, as compared to 2012, lends further support for Hypothesis 5, suggesting the 2016 campaign activated/strengthened beliefs about discrimination among white women.

1. The difference in the coefficient size is not statistically significant in the results presented in Table 4. When we estimate this relationship in a model that does not control for racial resentment and authoritarian attitudes, however, the difference in coefficient size across the 2012 and 2016 models is significant at the p<.05 level. [↑](#footnote-ref-1)
